# Supplementary material for: Collagen Crosslinking for Keratoconus: Cellular Signaling Mechanisms
Source: MDPI journal article supplement (doi:10.3390/biom13040696), 2023-04-20
Supplement: s1 [file s1]

**GAPDH molecular weight- 37 kDa; MagicMark ladder molecular weights = 20, 30, 40, 50, 60, 80, 100, 120, and 220 kDa**

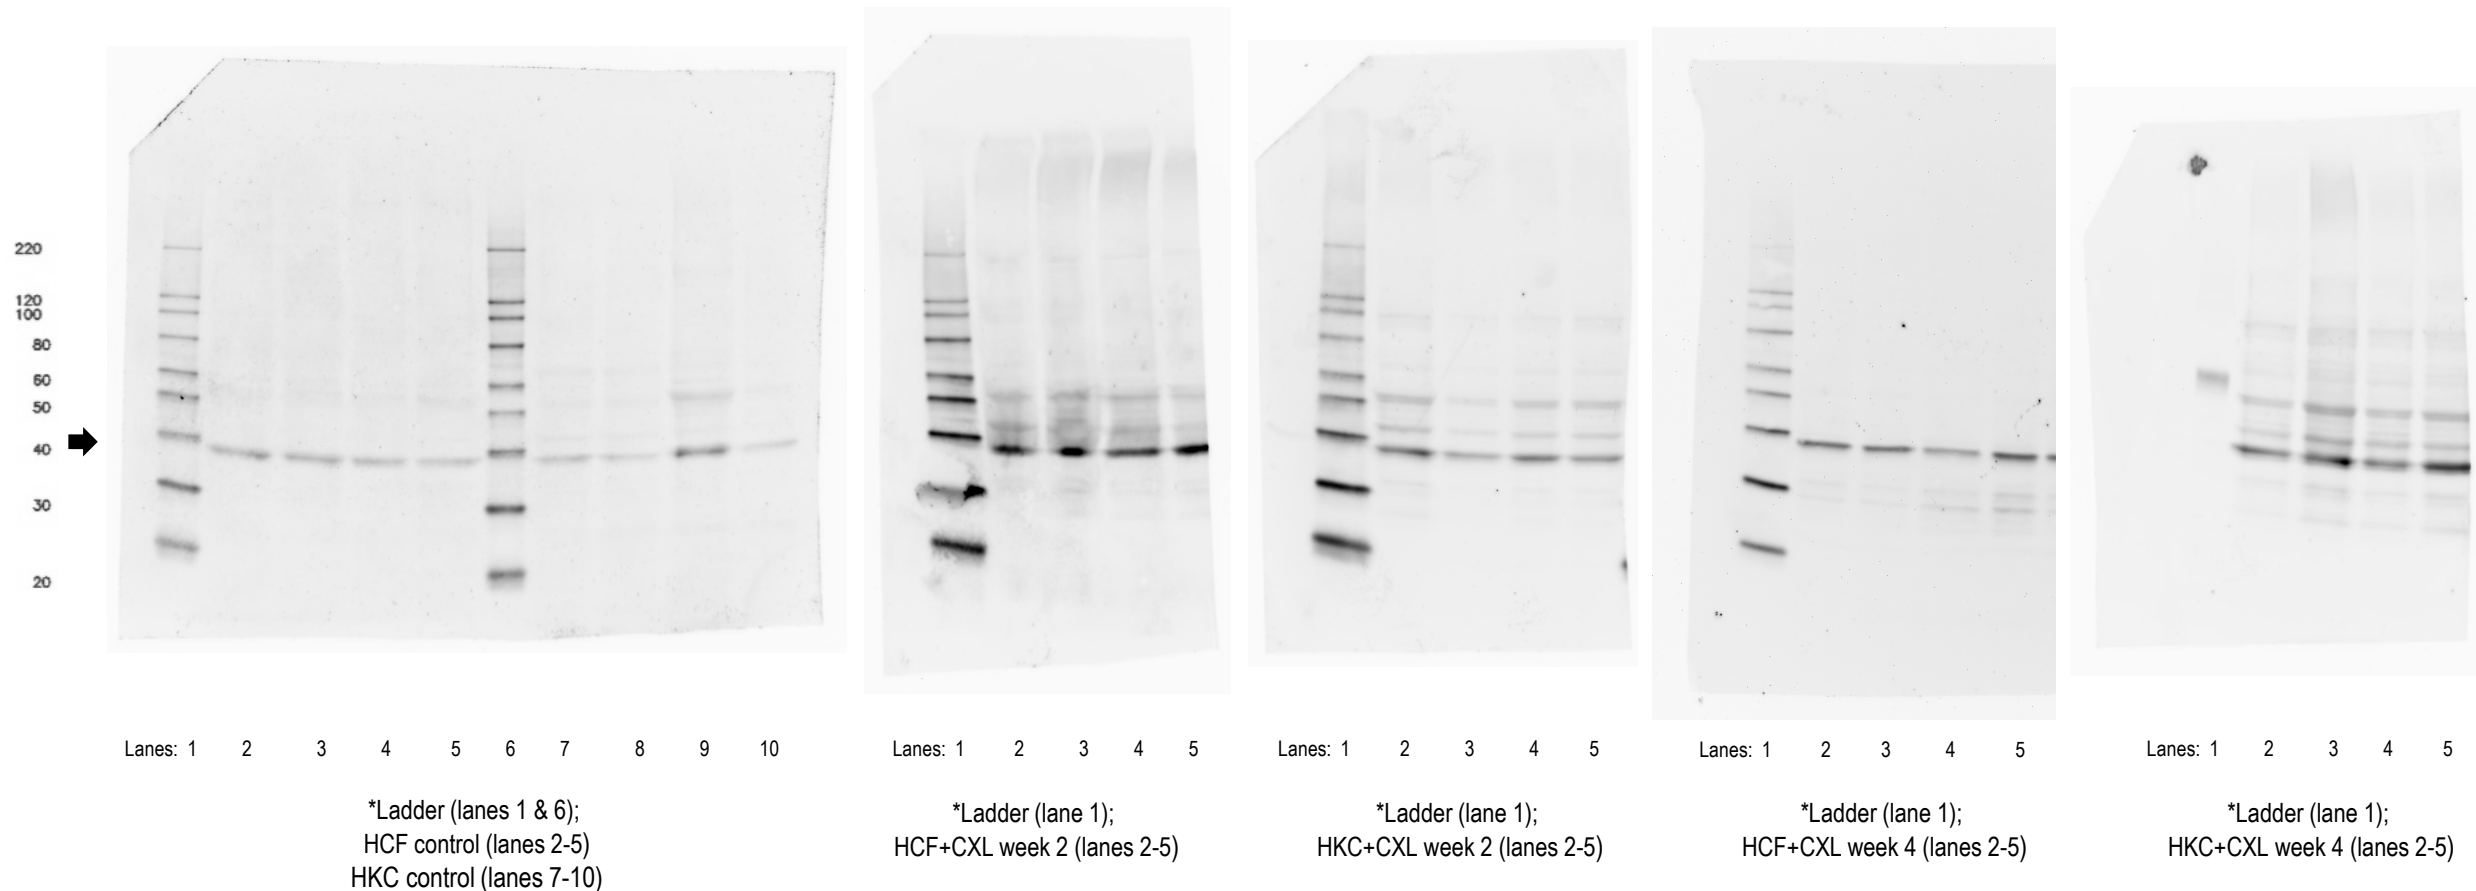

| GAPDH    | Total Density |             |                |                |                |                |
|----------|---------------|-------------|----------------|----------------|----------------|----------------|
|          | HCF control   | HKC control | HCF+CXL 2 week | HKC+CXL 2 week | HCF+CXL 4 week | HKC+CXL 4 week |
| sample 1 | 7.33E+07      | 1.33E+05    | 7.65E+07       | 9.64E+05       | 7.94E+07       | 2.01E+05       |
| sample 2 | 6.23E+07      | 1.23E+05    | 6.57E+07       | 6.57E+05       | 7.82E+07       | 2.78E+05       |
| sample 3 | 6.17E+07      | 6.17E+05    | 6.02E+07       | 1.02E+05       | 8.52E+07       | 1.23E+05       |
| sample 4 | 7.12E+07      | 9.12E+05    | 6.05E+07       | 1.05E+05       | 8.62E+07       | 3.30E+05       |

**Supplemental Figure S1.** Western Blot images and Total Density values of GAPDH protein expression in HCF and HKC 3D constructs following CXL treatment after 2 and 4 weeks. Constructs without treatment serve as controls. Each condition was repeated 4 times.

Wnt7b molecular weight- 39 kDa; MagicMark ladder molecular weights = 20, 30, 40, 50, 60, 80, 100, 120, and 220 kDa

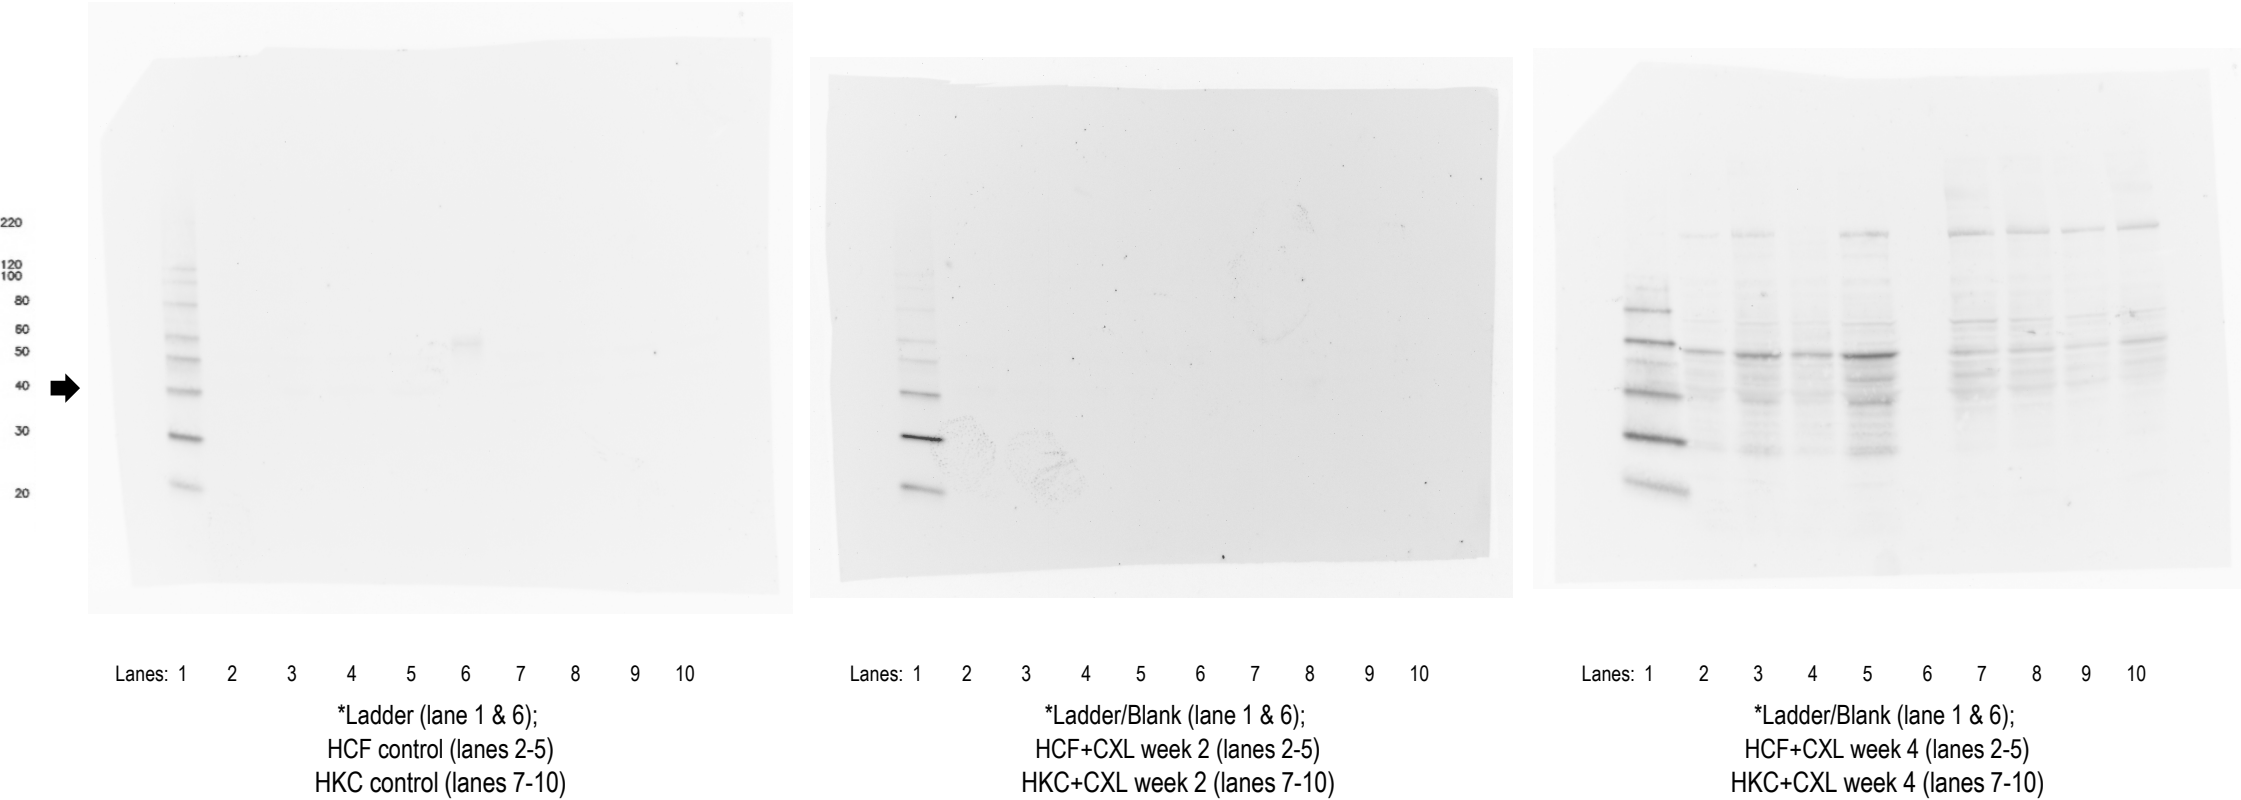

| Wnt7b    | Total Density |             |                |                |                |                |
|----------|---------------|-------------|----------------|----------------|----------------|----------------|
|          | HCF control   | HKC control | HCF+CXL 2 week | HKC+CXL 2 week | HCF+CXL 4 week | HKC+CXL 4 week |
| sample 1 | 2.49E+06      | 3.49E+05    | 5.43E+04       | 2.43E+04       | 1.92E+06       | 8.92E+06       |
| sample 2 | 5.38E+06      | 2.88E+05    | 6.10E+04       | 3.10E+04       | 2.00E+07       | 8.00E+06       |
| sample 3 | 5.35E+06      | 2.35E+05    | 5.67E+04       | 2.67E+04       | 4.57E+07       | 3.17E+06       |
| sample 4 | 8.03E+06      | 2.13E+05    | 4.58E+04       | 2.58E+04       | 2.83E+07       | 3.03E+06       |

**Supplemental Figure S2.** Western Blot images and Total Density values of Wnt7b protein expression in HCF and HKC 3D constructs following CXL treatment after 2 and 4 weeks. Constructs without treatment serve as controls. Each condition was repeated 4 times.

Wnt10a molecular weight- 46 kDa; MagicMark ladder molecular weights = 20, 30, 40, 50, 60, 80, 100, 120, and 220 kDa

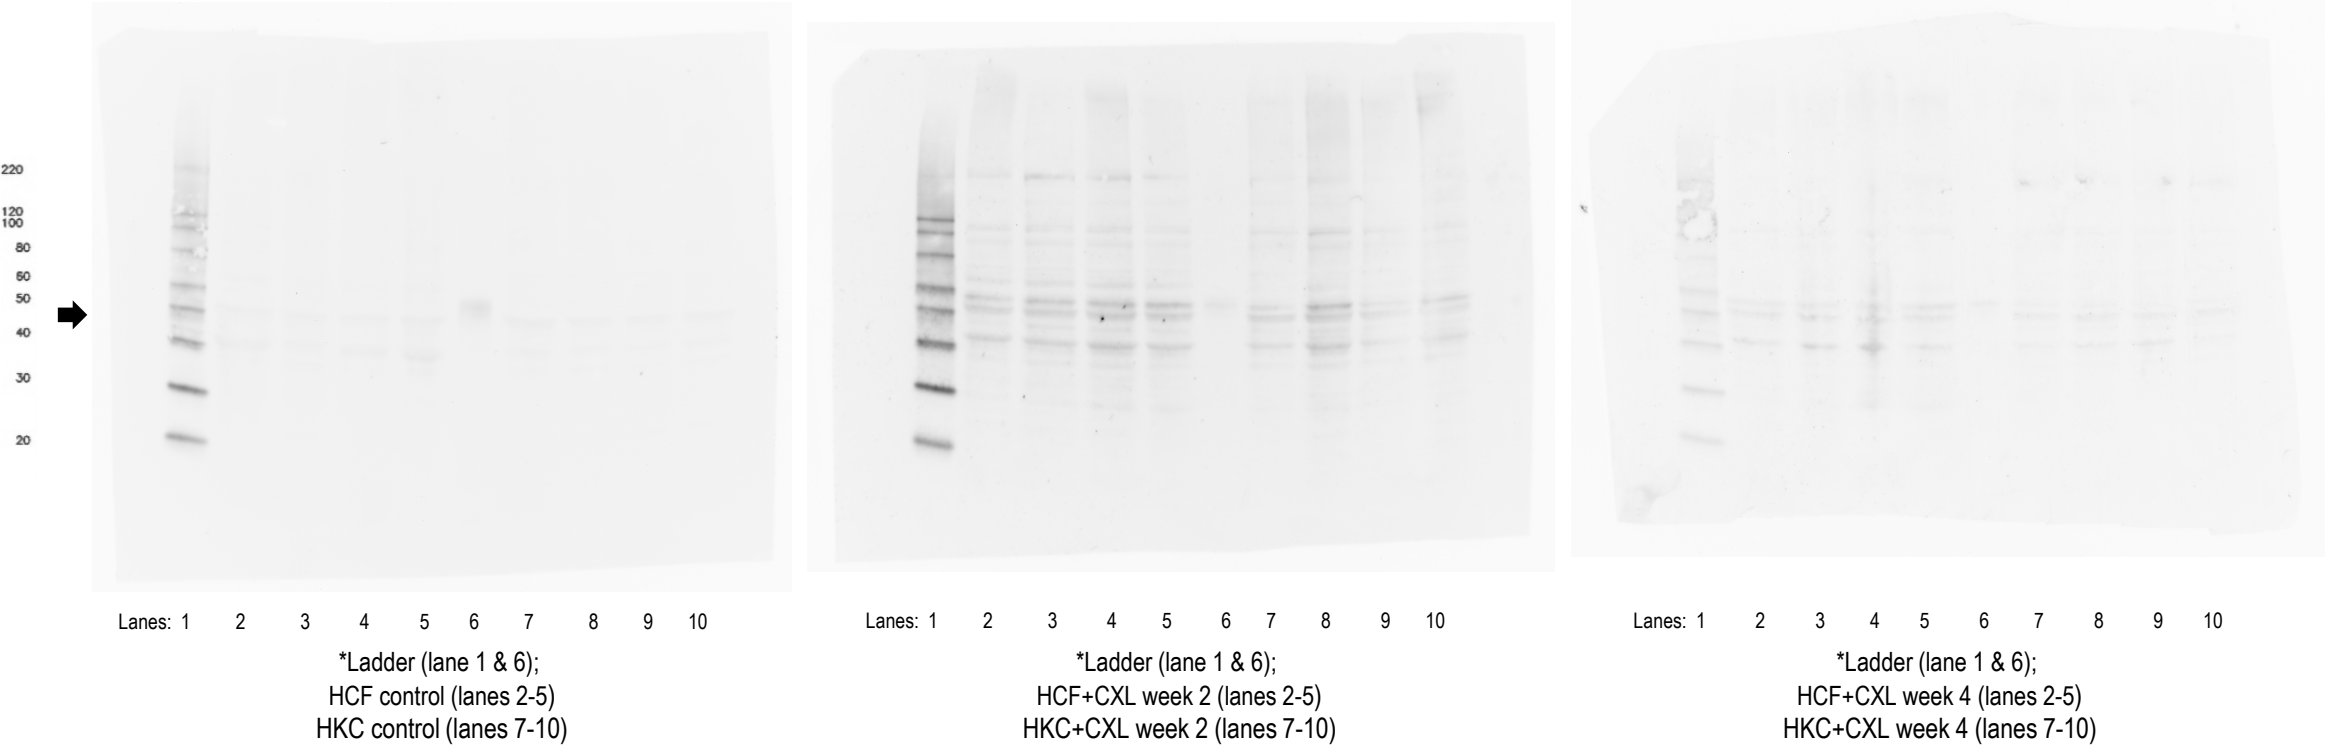

| Wnt10a   | Total Density |             |                |                |                |                |
|----------|---------------|-------------|----------------|----------------|----------------|----------------|
|          | HCF control   | HKC control | HCF+CXL 2 week | HKC+CXL 2 week | HCF+CXL 4 week | HKC+CXL 4 week |
| sample 1 | 1.49E+06      | 1.49E+06    | 9.43E+06       | 6.43E+06       | 3.92E+06       | 1.92E+06       |
| sample 2 | 1.38E+06      | 2.38E+06    | 1.10E+07       | 3.10E+06       | 6.00E+06       | 2.00E+06       |
| sample 3 | 2.35E+06      | 2.35E+06    | 1.67E+07       | 3.67E+06       | 9.57E+06       | 3.57E+06       |
| sample 4 | 1.03E+06      | 2.03E+06    | 8.58E+06       | 7.58E+06       | 3.83E+06       | 3.83E+06       |

**Supplemental Figure S3.** Western Blot images and Total Density values of Wnt10a protein expression in HCF and HKC 3D constructs following CXL treatment after 2 and 4 weeks. Constructs without treatment serve as controls. Each condition was repeated 4 times.

**SMA molecular weight- 42 kDa; MagicMark ladder molecular weights = 20, 30, 40, 50, 60, 80, 100, 120, and 220 kDa**

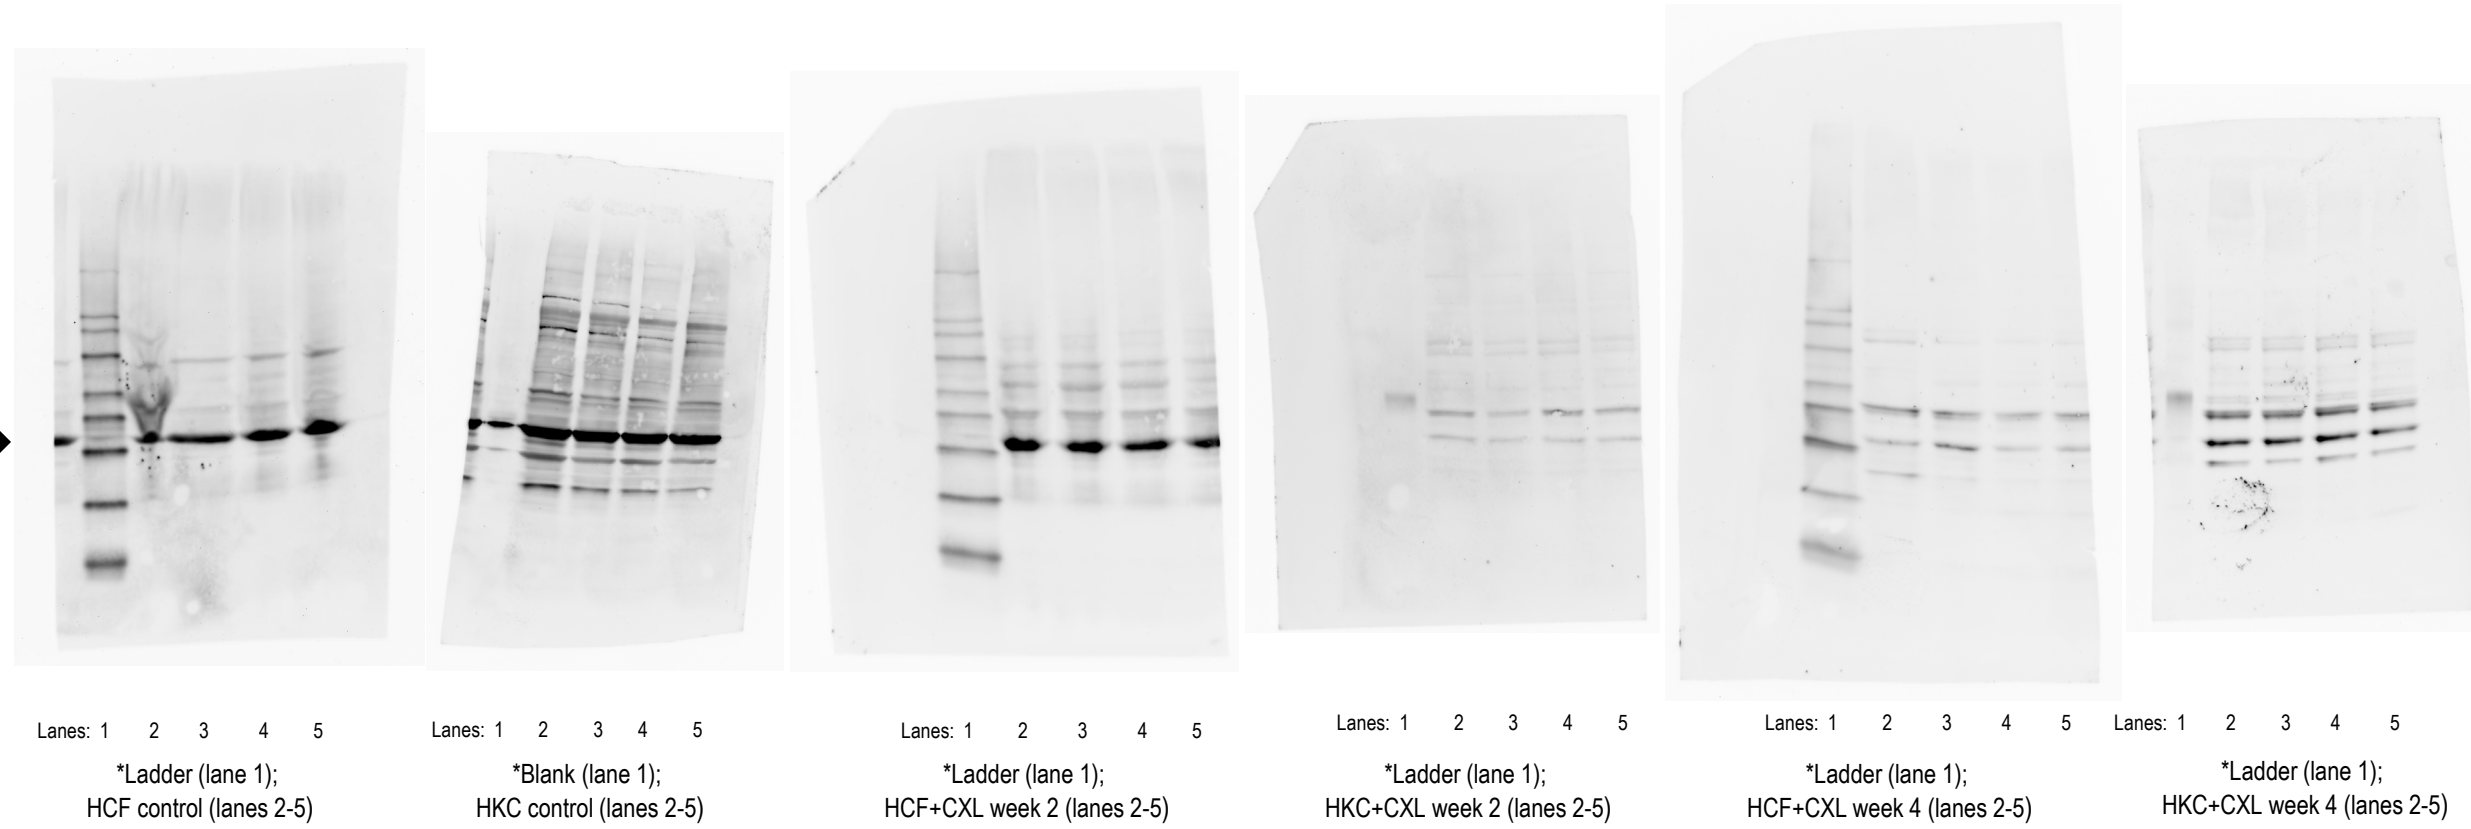

| SMA      | Total Density |             |                |                |                |                |
|----------|---------------|-------------|----------------|----------------|----------------|----------------|
|          | HCF control   | HKC control | HCF+CXL 2 week | HKC+CXL 2 week | HCF+CXL 4 week | HKC+CXL 4 week |
| sample 1 | 4.49E+07      | 3.69E+07    | 4.63E+05       | 1.13E+07       | 1.92E+07       | 1.72E+07       |
| sample 2 | 1.13E+07      | 4.08E+07    | 4.60E+05       | 6.40E+07       | 2.60E+07       | 1.60E+07       |
| sample 3 | 1.05E+07      | 3.35E+07    | 4.27E+05       | 8.37E+07       | 7.87E+07       | 1.87E+07       |
| sample 4 | 1.03E+07      | 4.83E+07    | 2.58E+05       | 7.98E+07       | 1.13E+07       | 1.03E+07       |

**Supplemental Figure S4.** Western Blot images and Total Density values of SMA protein expression in HCF and HKC 3D constructs following CXL treatment after 2 and 4 weeks. Constructs without treatment serve as controls. Each condition was repeated 4 times.



**PIP molecular weight- 17 kDa; MagicMark ladder molecular weights = 20, 30, 40, 50, 60, 80, 100, 120, and 220 kDa**

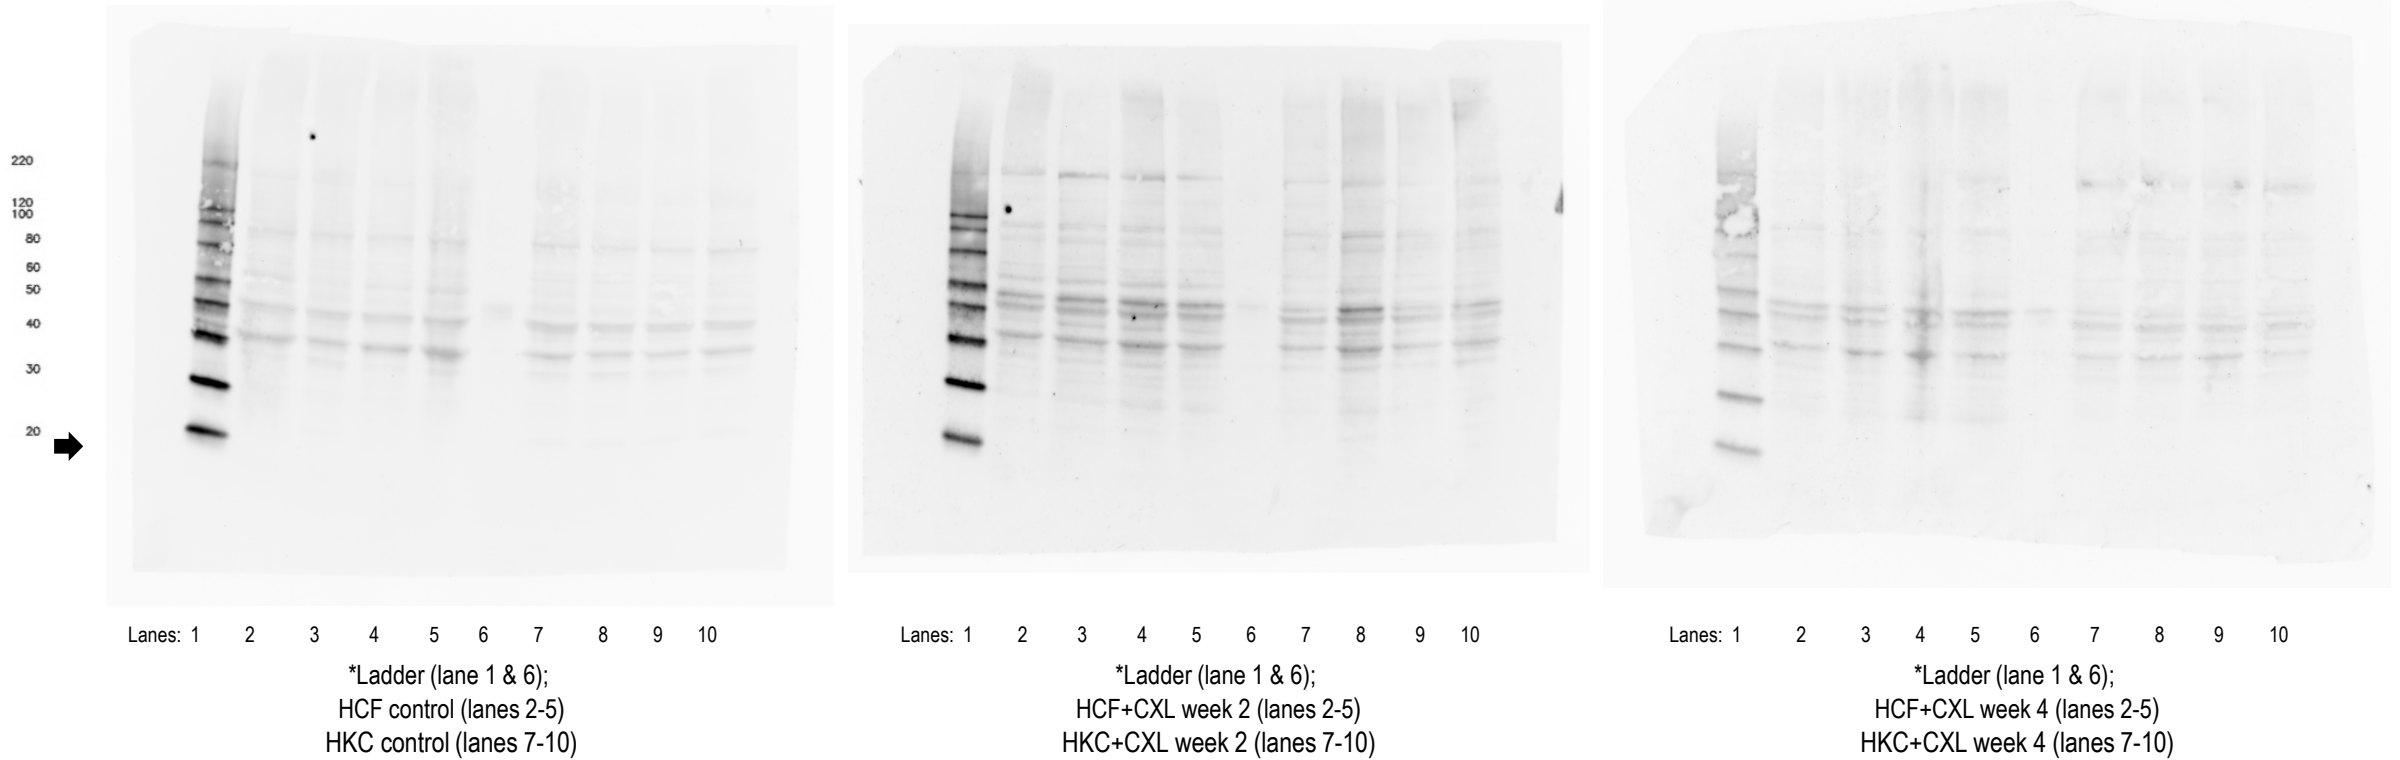

| PIP      | Total Density |             |                |                |                |                |
|----------|---------------|-------------|----------------|----------------|----------------|----------------|
|          | HCF control   | HKC control | HCF+CXL 2 week | HKC+CXL 2 week | HCF+CXL 4 week | HKC+CXL 4 week |
| sample 1 | 2.73E+07      | 1.22E+04    | 3.90E+05       | 3.26E+05       | 3.01E+05       | 6.41E+05       |
| sample 2 | 8.31E+07      | 1.01E+04    | 1.20E+06       | 2.21E+06       | 1.09E+05       | 4.23E+05       |
| sample 3 | 2.71E+07      | 4.99E+04    | 2.13E+06       | 2.67E+05       | 9.58E+05       | 2.48E+05       |
| sample 4 | 3.21E+07      | 6.63E+04    | 1.17E+06       | 1.12E+05       | 1.27E+05       | 1.74E+05       |

**Supplemental Figure S5.** Western Blot images and Total Density values of PIP protein expression in HCF and HKC 3D constructs following CXL treatment after 2 and 4 weeks. Constructs without treatment serve as controls. Each condition was repeated 4 times.

PGC1 molecular weight- 92 kDa; MagicMark ladder molecular weights = 20, 30, 40, 50, 60, 80, 100, 120, and 220 kDa

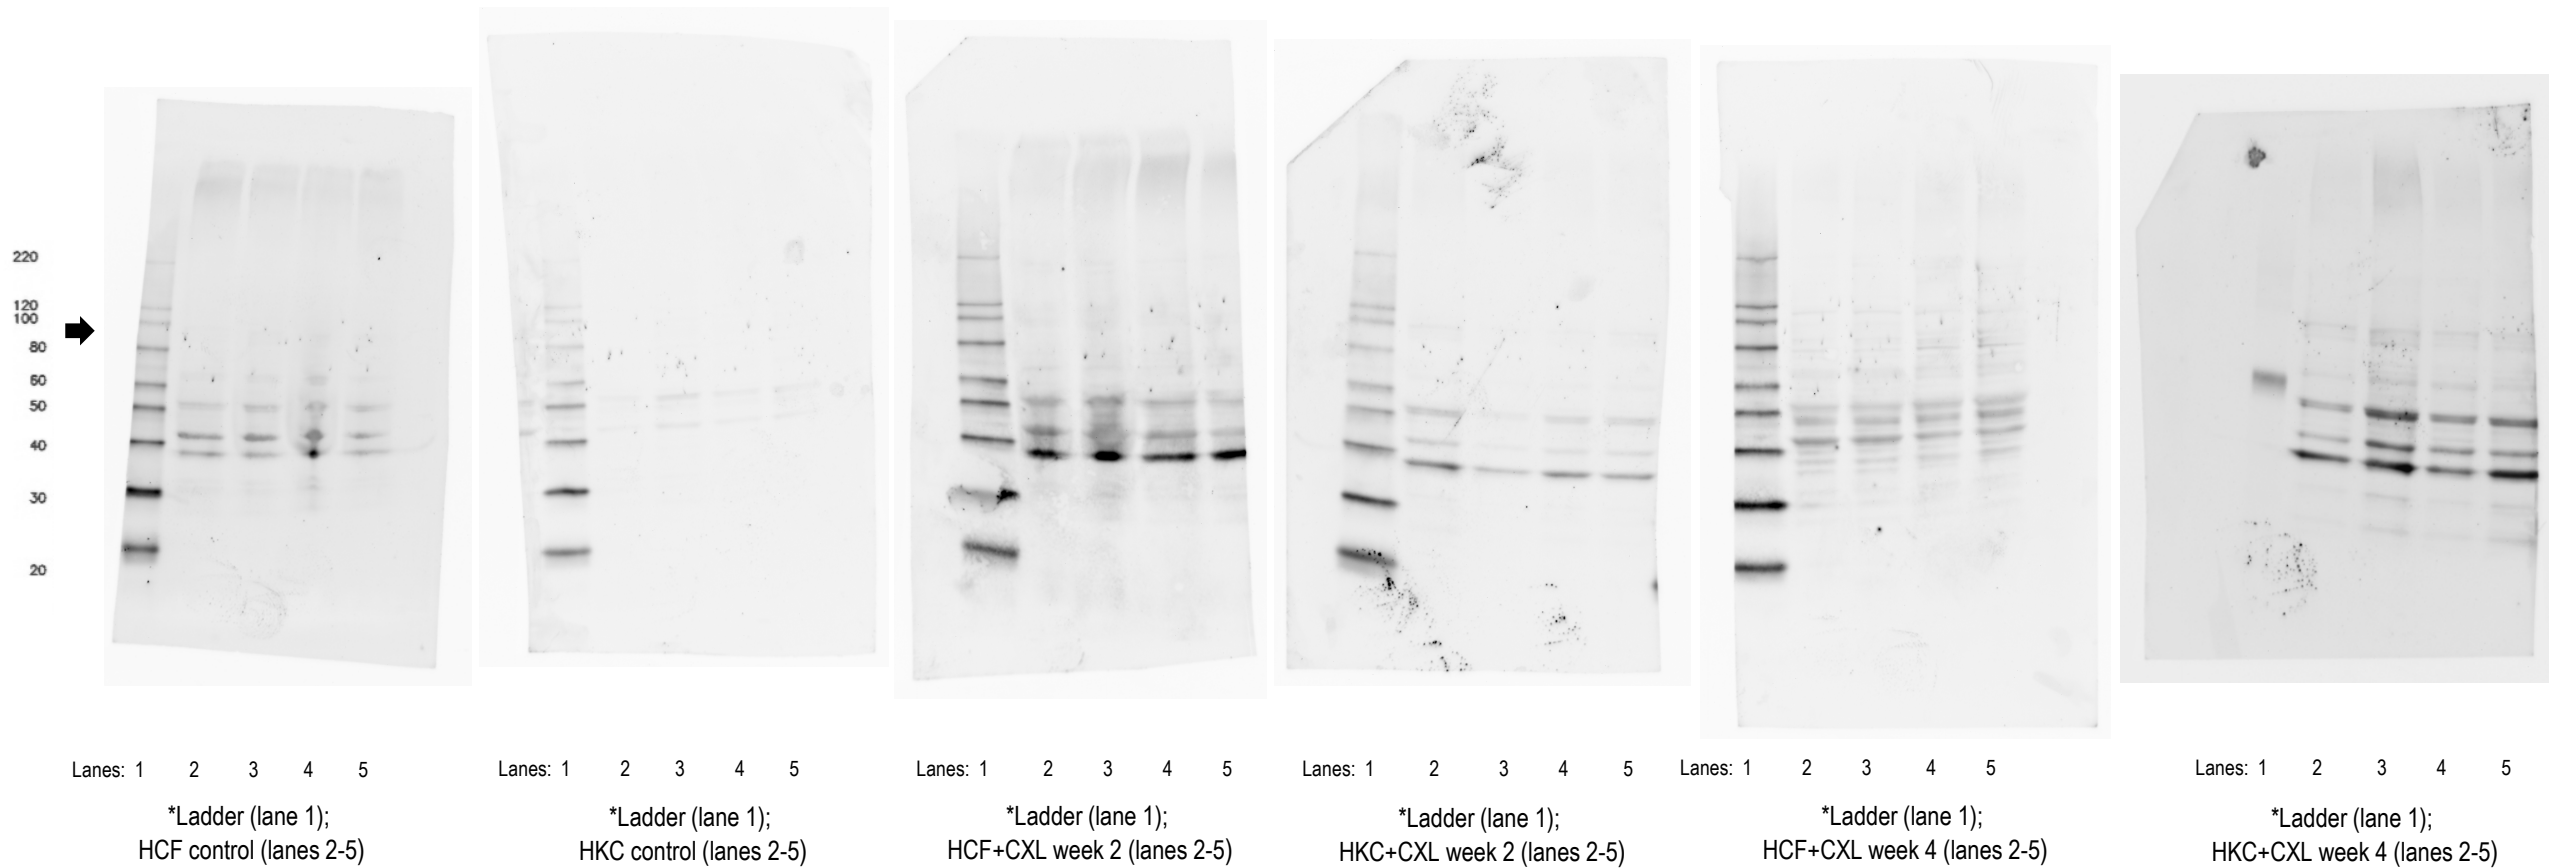

| PGC1     | Total Density |             |                |                |                |                |
|----------|---------------|-------------|----------------|----------------|----------------|----------------|
|          | HCF control   | HKC control | HCF+CXL 2 week | HKC+CXL 2 week | HCF+CXL 4 week | HKC+CXL 4 week |
| sample 1 | 2.09E+06      | 4.49E+05    | 3.03E+06       | 6.03E+06       | 2.22E+06       | 3.12E+06       |
| sample 2 | 2.98E+06      | 1.78E+05    | 6.11E+06       | 1.10E+07       | 4.30E+06       | 1.30E+06       |
| sample 3 | 1.97E+06      | 5.15E+05    | 1.87E+06       | 2.17E+06       | 2.67E+06       | 1.77E+06       |
| sample 4 | 2.53E+06      | 5.43E+05    | 6.68E+06       | 7.58E+06       | 3.33E+06       | 4.13E+06       |

**Supplemental Figure S6.** Western Blot images and Total Density values of PGC1 protein expression in HCF and HKC 3D constructs following CXL treatment after 2 and 4 weeks. Constructs without treatment serve as controls. Each condition was repeated 4 times.

**SRC molecular weight- 60 kDa; MagicMark ladder molecular weights = 20, 30, 40, 50, 60, 80, 100, 120, and 220 kDa**

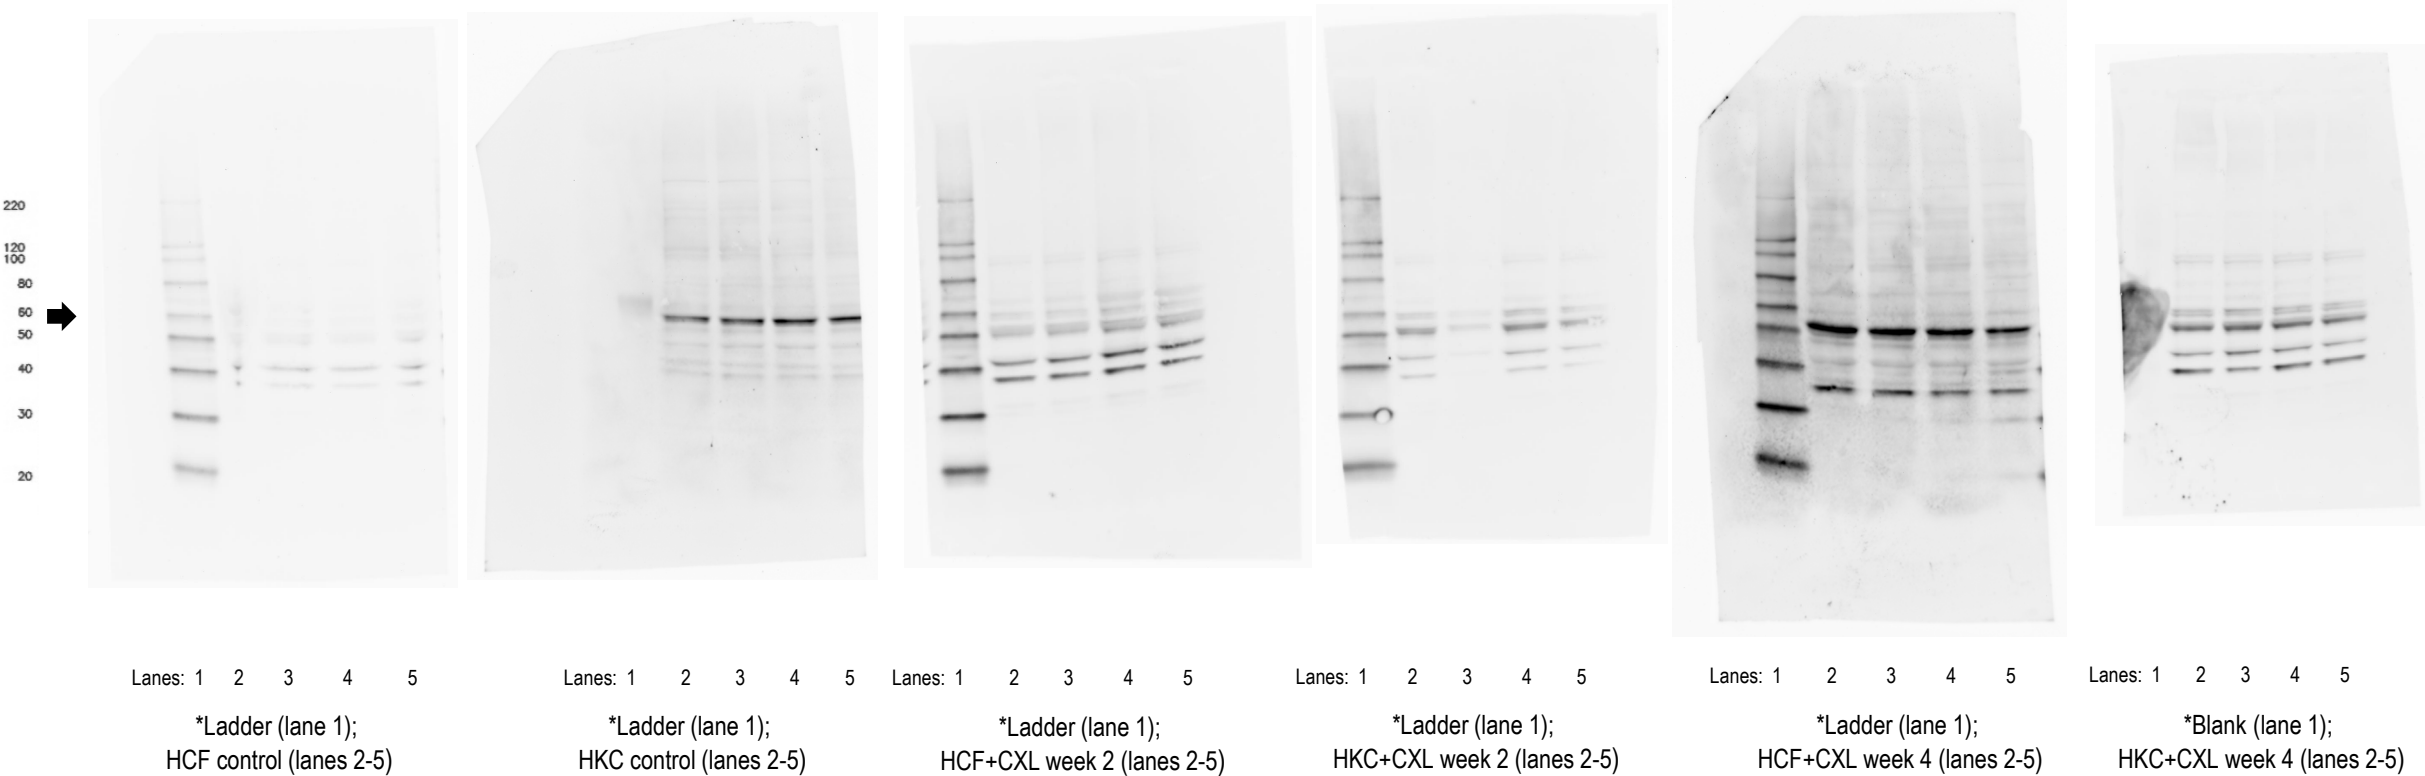

| SRC      | Total Density |             |                |                |                |                |
|----------|---------------|-------------|----------------|----------------|----------------|----------------|
|          | HCF control   | HKC control | HCF+CXL 2 week | HKC+CXL 2 week | HCF+CXL 4 week | HKC+CXL 4 week |
| sample 1 | 6.39E+03      | 4.69E+07    | 1.93E+04       | 8.73E+04       | 4.92E+06       | 3.02E+04       |
| sample 2 | 4.48E+03      | 4.78E+07    | 2.70E+04       | 2.40E+04       | 7.50E+06       | 2.00E+04       |
| sample 3 | 6.95E+03      | 6.45E+07    | 6.87E+04       | 1.37E+04       | 4.27E+06       | 2.97E+04       |
| sample 4 | 1.23E+03      | 5.03E+07    | 6.88E+04       | 5.18E+04       | 4.13E+06       | 2.53E+04       |

**Supplemental Figure S7.** Western Blot images and Total Density values of SRC protein expression in HCF and HKC 3D constructs following CXL treatment after 2 and 4 weeks. Constructs without treatment serve as controls. Each condition was repeated 4 times.

**CyclinD1 molecular weight- 34 kDa; MagicMark ladder molecular weights = 20, 30, 40, 50, 60, 80, 100, 120, and 220 kDa**

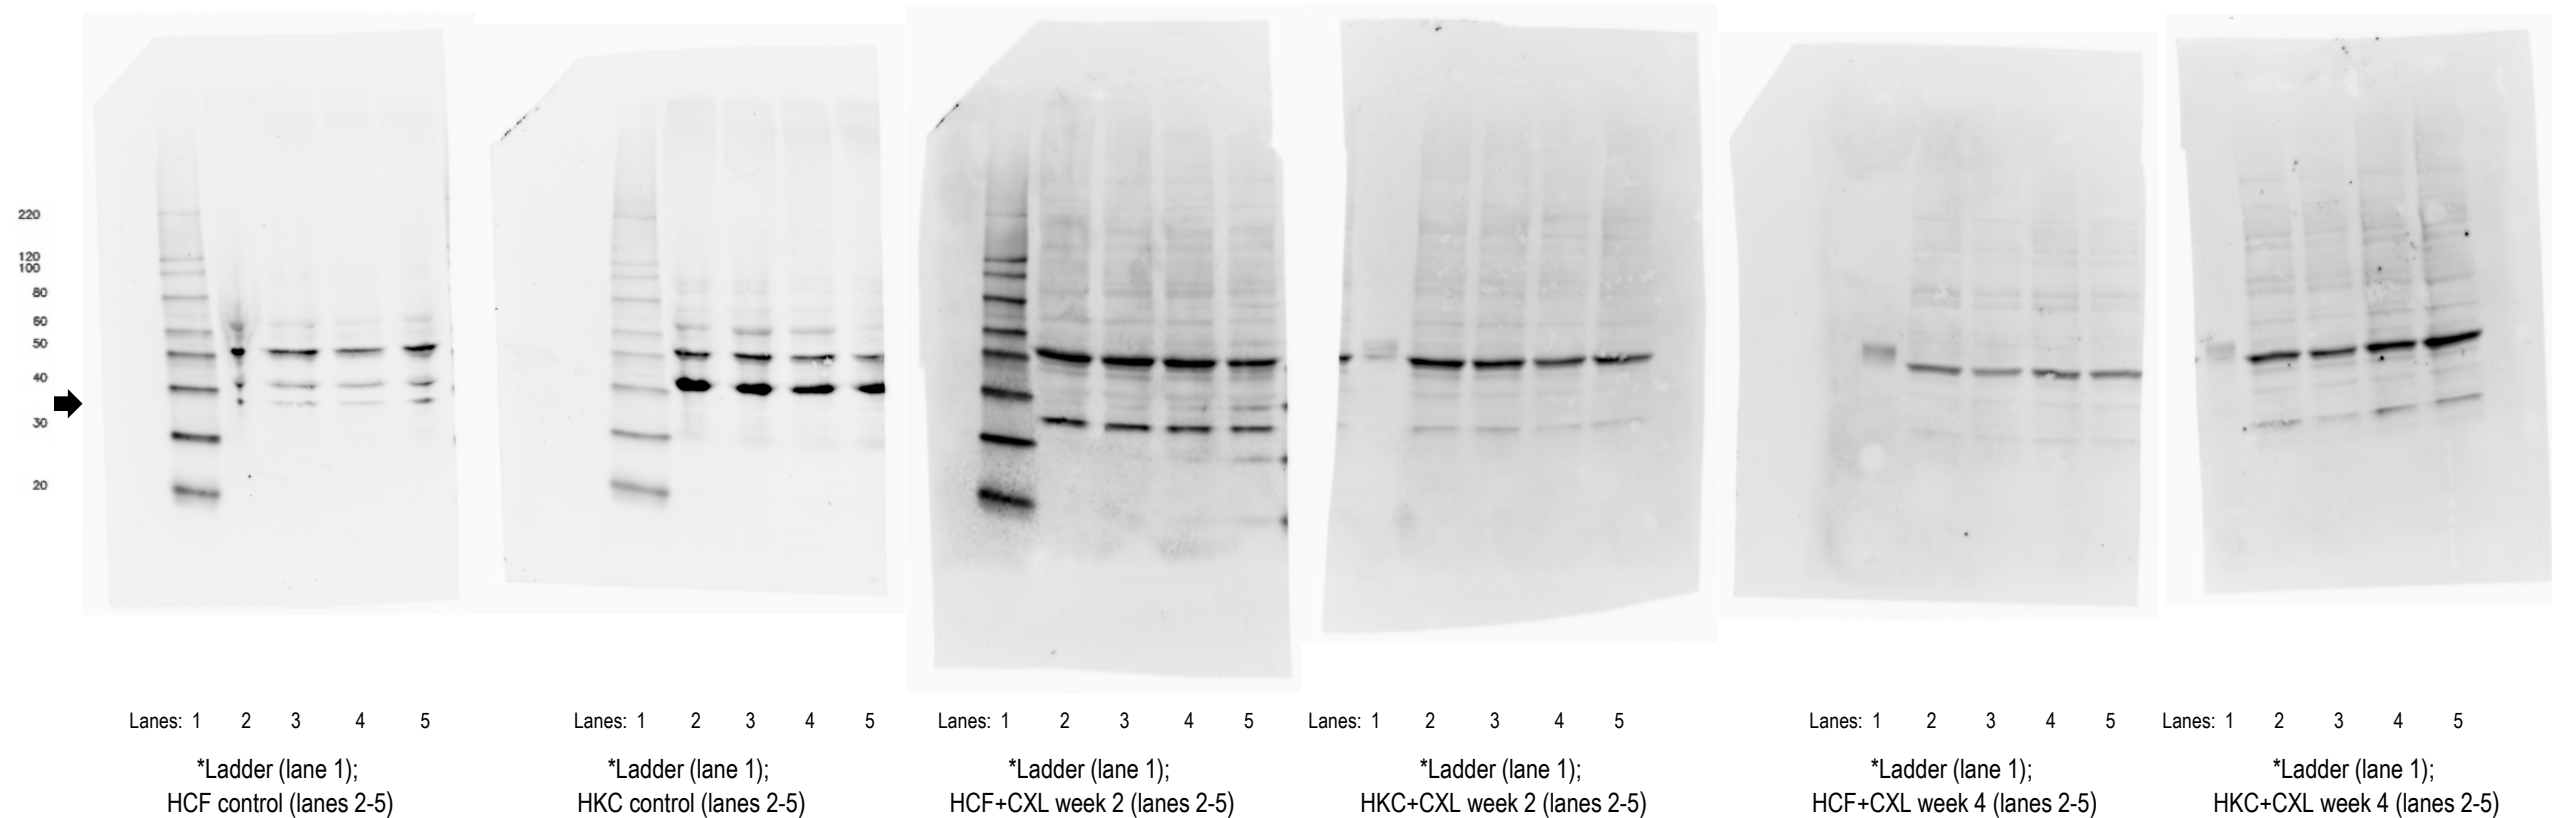

| CyclinD1 | Total Density |             |                |                |                |                |
|----------|---------------|-------------|----------------|----------------|----------------|----------------|
|          | HCF control   | HKC control | HCF+CXL 2 week | HKC+CXL 2 week | HCF+CXL 4 week | HKC+CXL 4 week |
| sample 1 | 6.39E+03      | 4.69E+07    | 1.93E+04       | 8.73E+04       | 4.92E+06       | 3.02E+04       |
| sample 2 | 4.48E+03      | 4.78E+07    | 2.70E+04       | 2.40E+04       | 7.50E+06       | 2.00E+04       |
| sample 3 | 6.95E+03      | 6.45E+07    | 6.87E+04       | 1.37E+04       | 4.27E+06       | 2.97E+04       |
| sample 4 | 1.23E+03      | 5.03E+07    | 6.88E+04       | 5.18E+04       | 4.13E+06       | 2.53E+04       |

**Supplemental Figure S8.** Western Blot images and Total Density values of CyclinD1 protein expression in HCF and HKC 3D constructs following CXL treatment after 2 and 4 weeks. Constructs without treatment serve as controls. Each condition was repeated 4 times.
